# Supplementary material
Source: HighWire-hosted journal article supplement (https://erj.ersjournals.com/content/60/2/2200930)
Supplement: inline-supplementary-material-1 [file inline-supplementary-material-1.pdf]

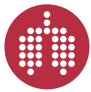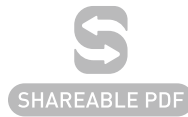

# Treatment outcomes of multidrug-resistant tuberculosis with chronic kidney/liver disease

Chiwook Chung <sup>1,5</sup>, Jung Eun Shin <sup>1,5</sup>, Doosoo Jeon <sup>2</sup>, Hyungseok Kang <sup>3</sup>, Jae-Joon Yim <sup>4</sup>,  
Kyung-Wook Jo <sup>1</sup> and Tae Sun Shim <sup>1</sup>

<sup>1</sup>Department of Pulmonary and Critical Care Medicine, University of Ulsan College of Medicine, Asan Medical Center, Seoul, Republic of Korea. <sup>2</sup>Department of Internal Medicine, Pusan National University Yangsan Hospital, Yangsan, Republic of Korea. <sup>3</sup>Department of Chest Medicine, Masan National Tuberculosis Hospital, Masan, Republic of Korea. <sup>4</sup>Division of Pulmonary and Critical Care Medicine, Department of Internal Medicine, Seoul National University College of Medicine, Seoul, Republic of Korea. <sup>5</sup>Chiwook Chung and Jung Eun Shin equally contributed to this work.

Corresponding author: Tae Sun Shim ([shimts@amc.seoul.kr](mailto:shimts@amc.seoul.kr))

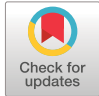

Shareable abstract (@ERSpublications)

**Bedaquiline and delamanid are effective and might be safe in patients with chronic kidney or liver disease. MDR-TB patients with these comorbidities receiving bedaquiline and/or delamanid have poor treatment outcomes, probably owing to the comorbidities.** <https://bit.ly/3NyDD15>

**Cite this article as:** Chung C, Shin JE, Jeon D, *et al.* Treatment outcomes of multidrug-resistant tuberculosis with chronic kidney/liver disease. *Eur Respir J* 2022; 60: 2200930 [DOI: 10.1183/13993003.00930-2022].

This single-page version can be shared freely online.

Copyright ©The authors 2022.  
For reproduction rights and  
permissions contact  
[permissions@ersnet.org](mailto:permissions@ersnet.org)

Received: 19 April 2022  
Accepted: 3 June 2022

*To the Editor:*

Each year, ~500 000 people worldwide suffer from rifampin-resistant tuberculosis (RR-TB) or multidrug-resistant tuberculosis (MDR-TB; resistance to both rifampin and isoniazid) [1]. Bedaquiline and delamanid are newly developed anti-TB drugs and their efficacies in the treatment of MDR/RR-TB have been well documented in both randomised controlled trials [2, 3] and cohort studies [4, 5]. As these new drugs have become widely used, evidence regarding their efficacy and safety in patients with chronic kidney or liver disease is needed urgently, as these organ impairments can affect drug metabolism or pharmacokinetics [6]. However, as bedaquiline and delamanid received accelerated approval based on phase 2 clinical trials, their effects in patients with comorbidities have not been fully evaluated [2, 3]. Therefore, this study aimed to assess the treatment profiles and outcomes in patients with MDR-TB receiving bedaquiline and/or delamanid in South Korea.
